# Supplementary material
Source: ML conference proceedings conference paper supplement (https://openreview.net/forum?id=aNrVaZlMQ0)
Supplement: supplementary_material [file attachment]

# Supplementary Materials: Recursive Token Merging for Video Diffusion-based Unrestricted Adversarial Attack

Anonymous Authors

## 1 ABLATION STUDY

We ablate our design in Table 1. In the first line, we replace TALO with the latent optimization strategy in previous work [1], which updates perturbation based on gradients of the entire denoising steps. We set the adversarial iteration number as 40, the same as our TALO total iteration number. From the first two lines, we can see that TALO strategy can boost adversarial transferability and temporal imperceptibility. From the last two lines, our ReToMe can achieve spatial and temporal imperceptibility with higher transferability.

Table 1: Ablation study of our TALO and ReToMe.

| TALO | ReToMe | Avg.ASR (%) | FID   | Subject Consistency (%) |
|------|--------|-------------|-------|-------------------------|
| ×    | ×      | 49.03       | 25.89 | 83.34                   |
| ✓    | ×      | 53.17       | 25.97 | 84.10                   |
| ✓    | ✓      | 59.25       | 25.65 | 88.03                   |

## REFERENCES

[1] Jianqi Chen, Hao Chen, Keyan Chen, Yilan Zhang, Zhengxia Zou, and Zhenwei Shi. 2023. Diffusion models for imperceptible and transferable adversarial attack. *arXiv preprint arXiv:2305.08192* (2023).
